# Supplementary material for: Truncated Electrochemical Aptasensor with Enhanced Antifouling Capability for Highly Sensitive Serotonin Detection
Source: MDPI journal article supplement (doi:10.3390/bios13090881), 2023-09-11
Supplement: s1 [file s1]

## Electronic Supplementary Material (ESI)

# Truncated Electrochemical Aptasensor with Enhanced Antifouling Capability for Highly Sensitive Serotonin Detection

Ziheng Hu <sup>1,2</sup>, Ruifeng Zhu <sup>1</sup>, Gabriela Figueroa-Miranda <sup>1</sup>, Lei Zhou <sup>1</sup>, Lingyan Feng <sup>3</sup>, Andreas Offenhäusser <sup>1</sup> and Dirk Mayer <sup>1,\*</sup>

<sup>1</sup> Institute of Biological Information Processing, Bioelectronics (IBI-3), Forschungszentrum Jülich GmbH, 52428 Jülich, Germany; z.hu@fz-juelich.de (Z.H.); r.zhu@fz-juelich.de (R.Z.); g.figueroa.miranda@fz-juelich.de (G.F.-M.); leizhou1@outlook.com (L.Z.); a.offenhausen@fz-juelich.de (A.O.)

<sup>2</sup> Faculty I, RWTH Aachen University, 52062 Aachen, Germany

<sup>3</sup> Department of Materials Genome Institute, and Department of Chemistry, College of Science, Shanghai University, Shanghai 200444, China; lingyanfeng@t.shu.edu.cn

\* Correspondence: dirk.mayer@fz-juelich.de

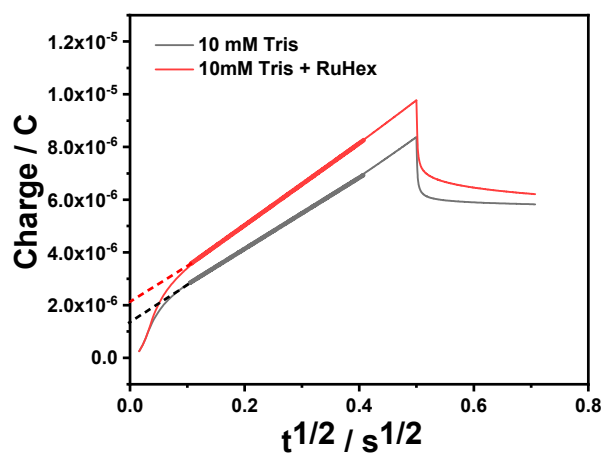

**Figure S1.** Determination of the surface density by chronocoulometric measurements in 10 mM Tris buffer and 50 mM RuHex.

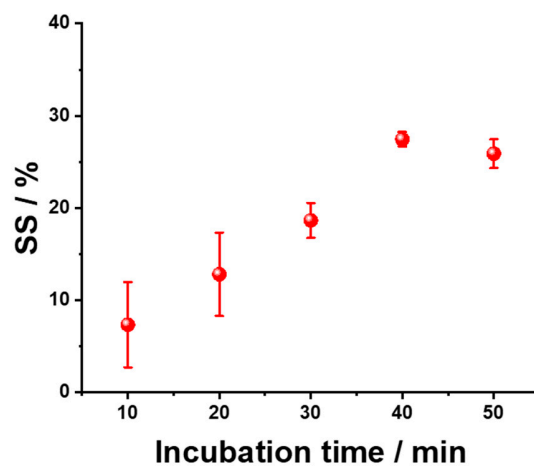

**Figure S2.** Optimization of the target incubation time.

**Table S1.** Performance comparison of the proposed electrochemical aptasensor with other serotonin sensors.

| Method             | Liner range              | Detection limit | Ref.             |
|--------------------|--------------------------|-----------------|------------------|
| Aptamer/AuNPs      | 750 nM - 2.5 $\mu$ M     | 300 nM          | [1]              |
| Aptamer/SWCNT      | 100 nM - 1 $\mu$ M       | -               | [2]              |
| Carbon spheres/GCE | 40 $\mu$ M - 750 $\mu$ M | 700 nM          | [3]              |
| AgNP/L-Cys/MXene   | 500 nM - 150 $\mu$ M     | 80 nM           | [4]              |
| Aptamer/Gold       | 1 $\mu$ M - 100 $\mu$ M  | 300 nM          | [5]              |
| AMTA/GCE           | 1 nM - 50 $\mu$ M        | 0.013 nM        | [6]              |
| Aptamer/PEG        | 0.1 nM - 1 $\mu$ M       | 0.14 nM         | <b>This work</b> |

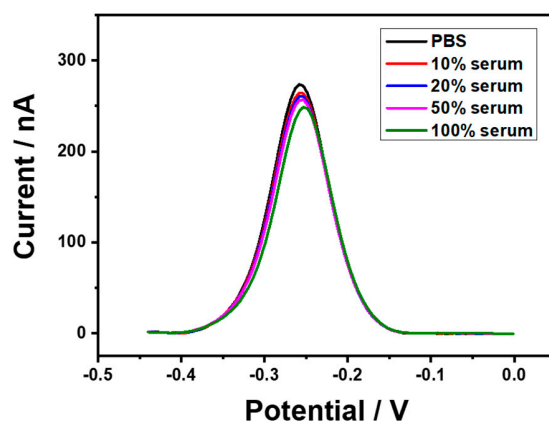

**Figure S3.** SWV responses of AuE with PEG blocking after incubation in different concentrations of human serum samples.

## References

- [1] J.L. Chávez, J.A. Hagen, N. Kelley-Loughnane, Fast and Selective Plasmonic Serotonin Detection with Aptamer-Gold Nanoparticle Conjugates, *Sensors*, 17 (2017), 681.
- [2] M. Dinarvand, E. Neubert, D. Meyer, G. Selvaggio, F.A. Mann, L. Erpenbeck, S. Kruss, Near-Infrared Imaging of Serotonin Release from Cells with Fluorescent Nanosensors, *Nano Letters*, 19 (2019), 6604-6611.
- [3] J. Zhou, M. Sheng, X. Jiang, G. Wu, F. Gao, Simultaneous Determination of Dopamine, Serotonin and Ascorbic Acid at a Glassy Carbon Electrode Modified with Carbon-Spheres, *Sensors*, 13 (2013), 14029-14040.
- [4] J. Chen, S. Li, Y. Chen, J. Yang, J. Dong, X. Lu, l-Cysteine-Terminated Triangular Silver Nanoplates/MXene Nanosheets are Used as Electrochemical Biosensors for Efficiently Detecting 5-Hydroxytryptamine, *Analytical Chemistry*, 93 (2021), 16655-16663.
- [5] R. Li, X. Li, L. Su, H. Qi, X. Yue, H. Qi, Label-free Electrochemical Aptasensor for the Determination of Serotonin, *Electroanalysis*, 34 (2022), 1048-1053.
- [6] S.B. Revin, S.A. John, Electrochemical sensor for neurotransmitters at physiological pH using a heterocyclic conducting polymer modified electrode, *Analyst*, 137 (2012), 209-215.
